# Supplementary material for: The incremental shuttle walk test predicts mortality in non-group 1 pulmonary hypertension: results from the ASPIRE Registry
Source: PubMed Central journal article supplement — Pulm Circ. 2019 May 29;9(2):2045894019848649. doi: 10.1177/2045894019848649 (PMC6542131; doi:10.1177/2045894019848649), 2019-05-29
Supplement: Supplementary_Material_updated.pdf [file Supplementary_Material_updated.pdf]

Table S1 . Treatment of patients

## A) Baseline patients

| Diagnostic Group  | Treatment                | Frequency | Percent |
|-------------------|--------------------------|-----------|---------|
| LHD-PH NO<br>CTD  | Calcium channel blocker  | 1         | 1.0     |
|                   | None                     | 96        | 93.2    |
|                   | oral monotherapy         | 6         | 5.8     |
|                   | Total                    | 103       | 100.0   |
| LUNG-PH NO<br>CTD | Calcium channel blocker  | 1         | 0.7     |
|                   | None                     | 85        | 57.8    |
|                   | oral dual therapy        | 6         | 4.1     |
|                   | oral monotherapy         | 48        | 32.7    |
|                   | prostenoid mono          | 2         | 1.4     |
|                   | prostenoid oral          | 4         | 2.7     |
|                   | Unknown                  | 1         | 0.7     |
| Total             | 147                      | 100.0     |         |
| CTEPH             | Pulmonary endarterectomy | 94        | 46.5    |
|                   | Calcium channel blocker  | 1         | 0.5     |
|                   | None                     | 90        | 44.6    |
|                   | oral dual therapy        | 11        | 5.4     |
|                   | oral monotherapy         | 87        | 43.1    |
|                   | prostenoid mono          | 7         | 3.5     |
|                   | prostenoid oral          | 2         | 1.0     |
|                   | Unknown                  | 4         | 2.0     |
| Total             | 202                      | 100.0     |         |
| UNCLEAR           | None                     | 10        | 37.0    |
|                   | oral dual therapy        | 2         | 7.4     |
|                   | oral monotherapy         | 10        | 37.0    |
|                   | prostenoid mono          | 5         | 18.5    |
|                   | Total                    | 27        | 100.0   |

B) Patients at 1 year follow-up (n=150)

| Diagnostic Group       | Treatment                | Frequency | Percent |
|------------------------|--------------------------|-----------|---------|
| LHD-PH                 | None                     | 8         | 61.5    |
|                        | oral monotherapy         | 5         | 38.5    |
| LUNG-PH                | None                     | 9         | 26.5    |
|                        | oral dual therapy        | 2         | 5.9     |
|                        | oral monotherapy         | 21        | 61.8    |
|                        | prostenoid mono          | 1         | 2.9     |
|                        | prostenoid oral          | 1         | 2.9     |
| All CTEPH              | Pulmonary endarterectomy | 49        | 52.6    |
|                        | Calcium channel blocker  | 1         | 1.1     |
|                        | None                     | 42        | 45.2    |
|                        | oral dual therapy        | 6         | 6.5     |
|                        | oral monotherapy         | 36        | 38.7    |
|                        | prostenoid mono          | 4         | 4.3     |
|                        | prost oral               | 1         | 1.1     |
|                        | Unknown                  | 3         | 3.2     |
| CTEPH –<br>had surgery | NONE                     | 32        | 65.3    |
|                        | oral monotherapy         | 11        | 22.4    |
|                        | oral dual therapy        | 1         | 2.0     |
|                        | prostenoid mono          | 2         | 4.1     |
|                        | prostenoid oral          | 1         | 2.0     |
| Unclear                | none                     | 2         | 20.0    |
|                        | oral dual therapy        | 1         | 10.0    |
|                        | oral monotherapy         | 5         | 50.0    |
|                        | prostenoid mono          | 2         | 20.0    |

LHD: left heart disease; PH: pulmonary hypertension; CTEPH: chronic thromboembolic pulmonary hypertension



|         |                   |   |         |         |         |        |        |        |         |         |
|---------|-------------------|---|---------|---------|---------|--------|--------|--------|---------|---------|
|         |                   | N | 201     | 200     | 192     | 200    | 197    | 200    | 201     | 146     |
|         | Levels 5          | r | -.314** | -.141*  | -.273** | .303** | .302** | .408** | -.541** | -.375** |
|         | %pred             | p | .000    | .047    | .000    | .000   | .000   | .000   | .000    | .000    |
|         |                   | N | 201     | 200     | 192     | 200    | 197    | 200    | 201     | 146     |
| Group 5 | ISWD m            | r | .036    | -.052   | -.153   | .488** | .425*  | .236   | -.640** | -.571*  |
|         |                   | p | .858    | .797    | .445    | .010   | .031   | .236   | .000    | .013    |
|         |                   | N | 27      | 27      | 27      | 27     | 26     | 27     | 27      | 18      |
|         | ISWD %pred        | r | -.052   | -.183   | -.216   | .531** | .500** | .263   | -.697** | -.521*  |
|         |                   | p | .798    | .360    | .280    | .004   | .009   | .184   | .000    | .026    |
|         |                   | N | 27      | 27      | 27      | 27     | 26     | 27     | 27      | 18      |
|         | Levels 5 Distance | r | .000    | .021    | -.033   | .349   | .308   | .128   | -.552** | -.555*  |
|         |                   | p | .998    | .917    | .870    | .074   | .126   | .523   | .003    | .017    |
|         |                   | N | 27      | 27      | 27      | 27     | 26     | 27     | 27      | 18      |
|         | Levels 5 %pred    | r | .061    | -.117   | -.152   | .408*  | .351   | .150   | -.569** | -.601** |
|         |                   | p | .764    | .561    | .450    | .035   | .079   | .455   | .002    | .008    |
|         |                   | N | 27      | 27      | 27      | 27     | 26     | 27     | 27      | 18      |
| Age >65 | ISWD m            | r | -.206** | -.283** | -.293** | .300** | .276** | .228** | .333**  | -.534** |
|         |                   | p | .001    | .000    | .000    | .000   | .000   | .000   | .000    | .000    |
|         |                   | N | 272     | 272     | 266     | 270    | 269    | 268    | 246     | 272     |
|         | ISWD %pred        | r | -.188** | -.338** | -.319** | .266** | .272** | .235** | .392**  | -.568** |
|         |                   | p | .002    | .000    | .000    | .000   | .000   | .000   | .000    | .000    |
|         |                   | N | 272     | 272     | 266     | 270    | 269    | 268    | 246     | 272     |
|         | Levels 5 Distance | r | -.232** | -.282** | -.296** | .307** | .279** | .218** | .334**  | -.542** |
|         |                   | p | .000    | .000    | .000    | .000   | .000   | .000   | .000    | .000    |
|         |                   | N | 272     | 272     | 266     | 270    | 269    | 268    | 246     | 272     |
|         | Levels 5 %pred    | r | -.217** | -.344** | -.335** | .291** | .282** | .244** | .370**  | -.558** |
|         |                   | p | .000    | .000    | .000    | .000   | .000   | .000   | .000    | .000    |
|         |                   | N | 272     | 272     | 266     | 270    | 269    | 268    | 246     | 272     |

\*\* . Correlation is significant at the 0.01 level (2-tailed).

\* . Correlation is significant at the 0.05 level (2-tailed).

ISWD: Incremental Shuttle Walk Test distance; mRAP: mean right atrial pressure; mPAP: mean pulmonary artery pressure; PVR: pulmonary vascular resistance; CO: cardiac output; CI: cardiac index; SmvO<sub>2</sub>: mixed venous oxygen saturation; WHO: World Health Organization
